# Supplementary material for: Potential Immune-Inflammatory Proteome Biomarkers for Guiding the Treatment of Patients with Primary Acute Angle-Closure Glaucoma Caused by COVID-19
Source: PubMed Central journal article supplement — J Proteome Res. 2024 Jun 5;23(7):2587–97. doi: 10.1021/acs.jproteome.4c00325 (PMC11232099; doi:10.1021/acs.jproteome.4c00325), 2024-06-05

## Supporting Information

Potential immune-inflammatory proteome biomarkers for guiding the treatment of patients with primary acute angle-closure glaucoma caused by COVID-19

Qiaoyun Gong<sup>1-5</sup>; Mingshui Fu<sup>1-5</sup>; Jingyi Wang<sup>1-5</sup>; Shuzhi Zhao<sup>1-5</sup>; Haiyan Wang\*<sup>1-5</sup>

<sup>1</sup> Department of Ophthalmology, Shanghai General Hospital, Shanghai Jiao Tong University, Shanghai 200080, China

<sup>2</sup> National Clinical Research Center for Eye Diseases, Shanghai 200080, China

<sup>3</sup> Shanghai Key Laboratory of Ocular Fundus Diseases, Shanghai 200080, China

<sup>4</sup> Shanghai Engineering Center for Visual Science and Photomedicine, Shanghai 200080, China

<sup>5</sup> Shanghai Engineering Center for Precise Diagnosis and Treatment of Eye Disease, Shanghai 200080, China

**Table S1.** Unchanged proteins between PAACG and cataract.

**Figure S1.** Quality check of 38 samples in this study.

**Figure S2.** AUC evaluation of the top 8 changed proteins in the PAACG cohort.

**Table S1. Unchanged proteins between PAACG and cataract**

| Assay     | FC          | <i>p</i>    | Adjusted <i>p</i> |
|-----------|-------------|-------------|-------------------|
| IL-17C    | 1.31218684  | 0.052783973 | 0.063066566       |
| IL-24     | 1.081890686 | 0.278522562 | 0.328513791       |
| IL-15RA   | 1.070594079 | 0.298700994 | 0.347854322       |
| ARTN      | 1.080345398 | 0.359105598 | 0.412946151       |
| IL-22 RA1 | 1.155390491 | 0.363572155 | 0.412946151       |
| IL2       | 1.071537716 | 0.420841479 | 0.472163611       |
| NRTN      | 0.965011755 | 0.536034994 | 0.594159271       |
| IL4       | 1.072190348 | 0.561698718 | 0.615193834       |
| SLAMF1    | 1.054254099 | 0.585703526 | 0.633937934       |
| IL-17A    | 1.038449116 | 0.629913444 | 0.673860894       |
| TRANCE    | 1.045279255 | 0.649566279 | 0.686897674       |
| TSLP      | 1.056976781 | 0.675290034 | 0.705985035       |
| IL-2RB    | 1.038453662 | 0.686559670 | 0.709702131       |
| IL5       | 1.00537901  | 0.956673935 | 0.960341359       |
| Beta-NGF  | 0.998772424 | 0.956977705 | 0.960341359       |
| IL13      | 1.003125862 | 0.960341359 | 0.960341359       |

### Supplementary Figures

**Figure S1.** Quality check of 38 samples in this study. (A) Boxplot, (B) PCA plot, (C) scatter plot demonstrated the AH samples included were eligible for NPX value, compared to inter-plate control.

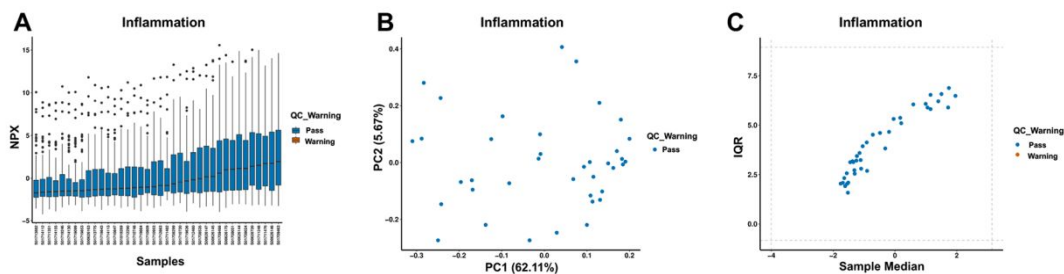

**Figure S2.** AUC evaluation of the top 8 changed proteins in the PAACG cohort.

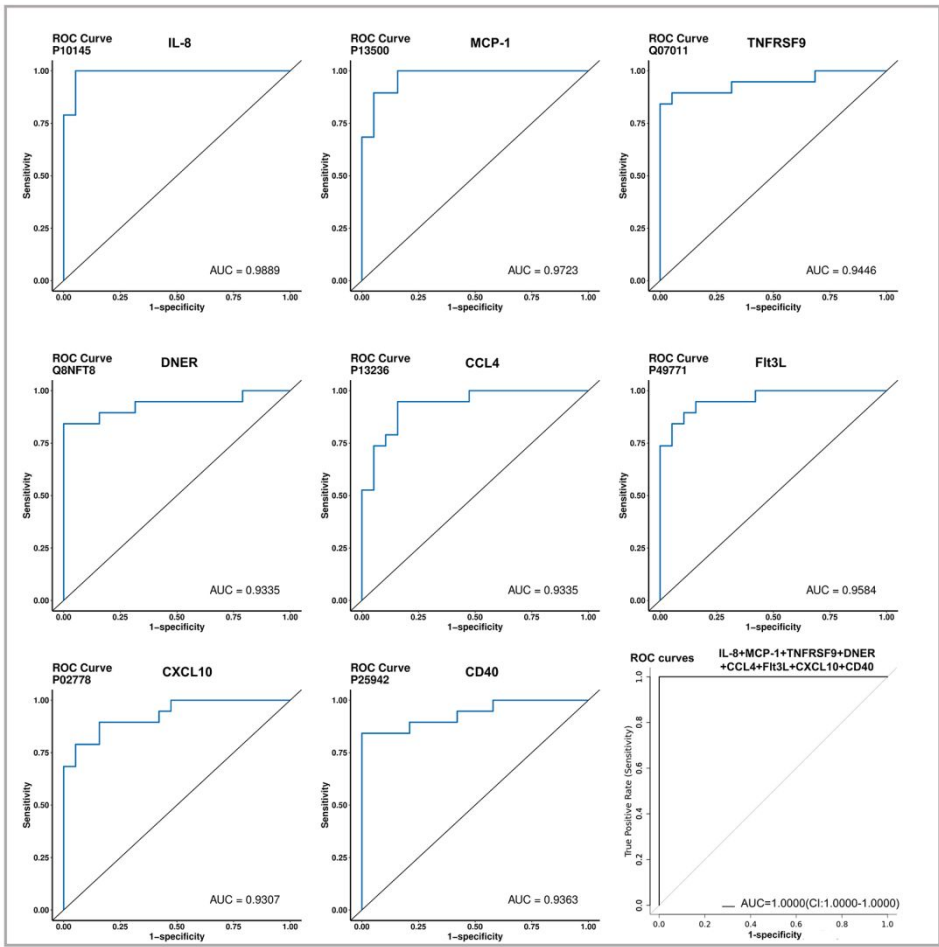

Supplement: pr4c00325_si_001.pdf [file pr4c00325_si_001.pdf]
